# Supplementary material
Source: PubMed Central journal article supplement (PMC4611238)
Supplement: hdy201543x1.pdf [file hdy201543x1.pdf]

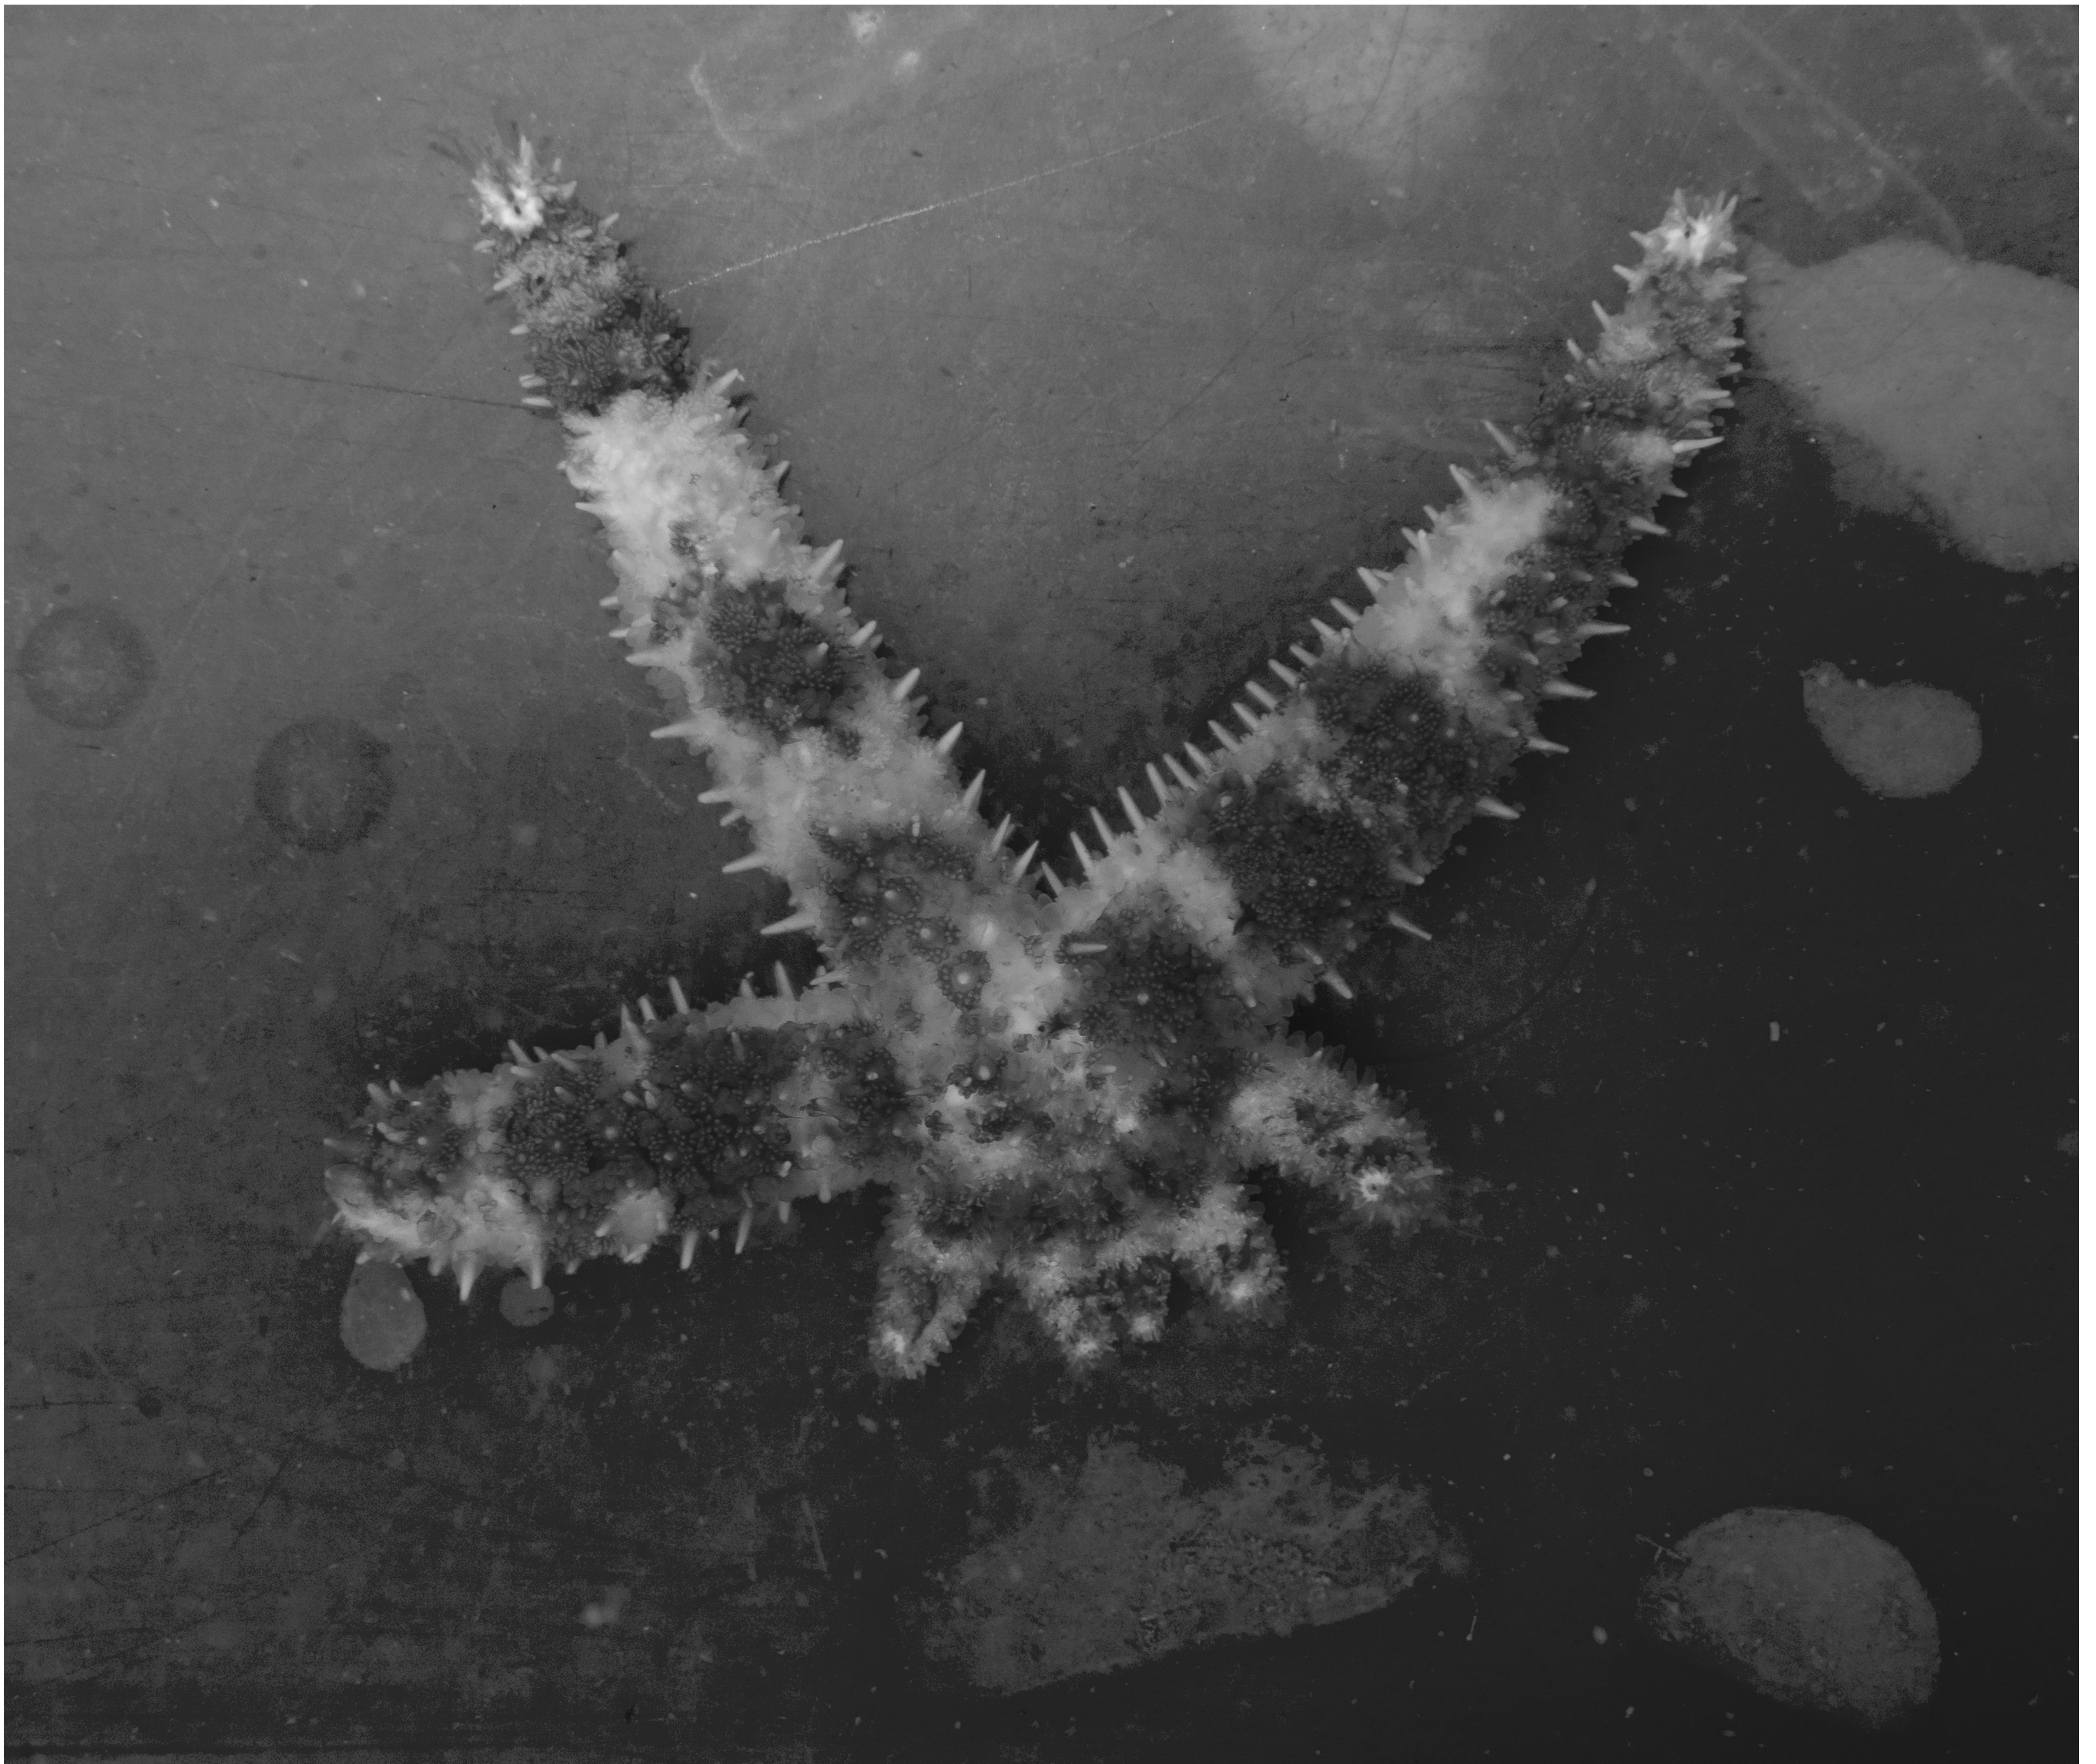

**SF 1.** Picture of the aboral side of a *Coscinasterias tenuispina* individual in black and white image. The individual had three non-regenerating arms, that were longer, and five shorter regenerating arms.
