# Supplementary material
Source: PubMed Central journal article supplement (PMC4611238)
Supplement: hdy201543x2.pdf [file hdy201543x2.pdf]

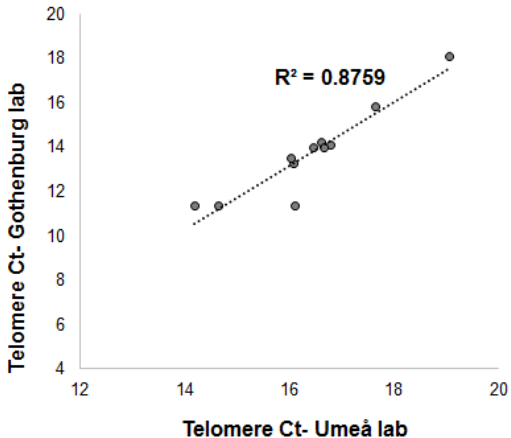

**SF 2.** Telomere length PCR verification. Eleven samples were sent to an independent laboratory in Umeå, Sweden, and reanalyzed for telomere length. The samples telomere Ct-values were compared between Gothenburg and Umeå laboratories.
