# Supplementary material
Source: PubMed Central journal article supplement (PMC4611238)
Supplement: hdy201543x3.pdf [file hdy201543x3.pdf]

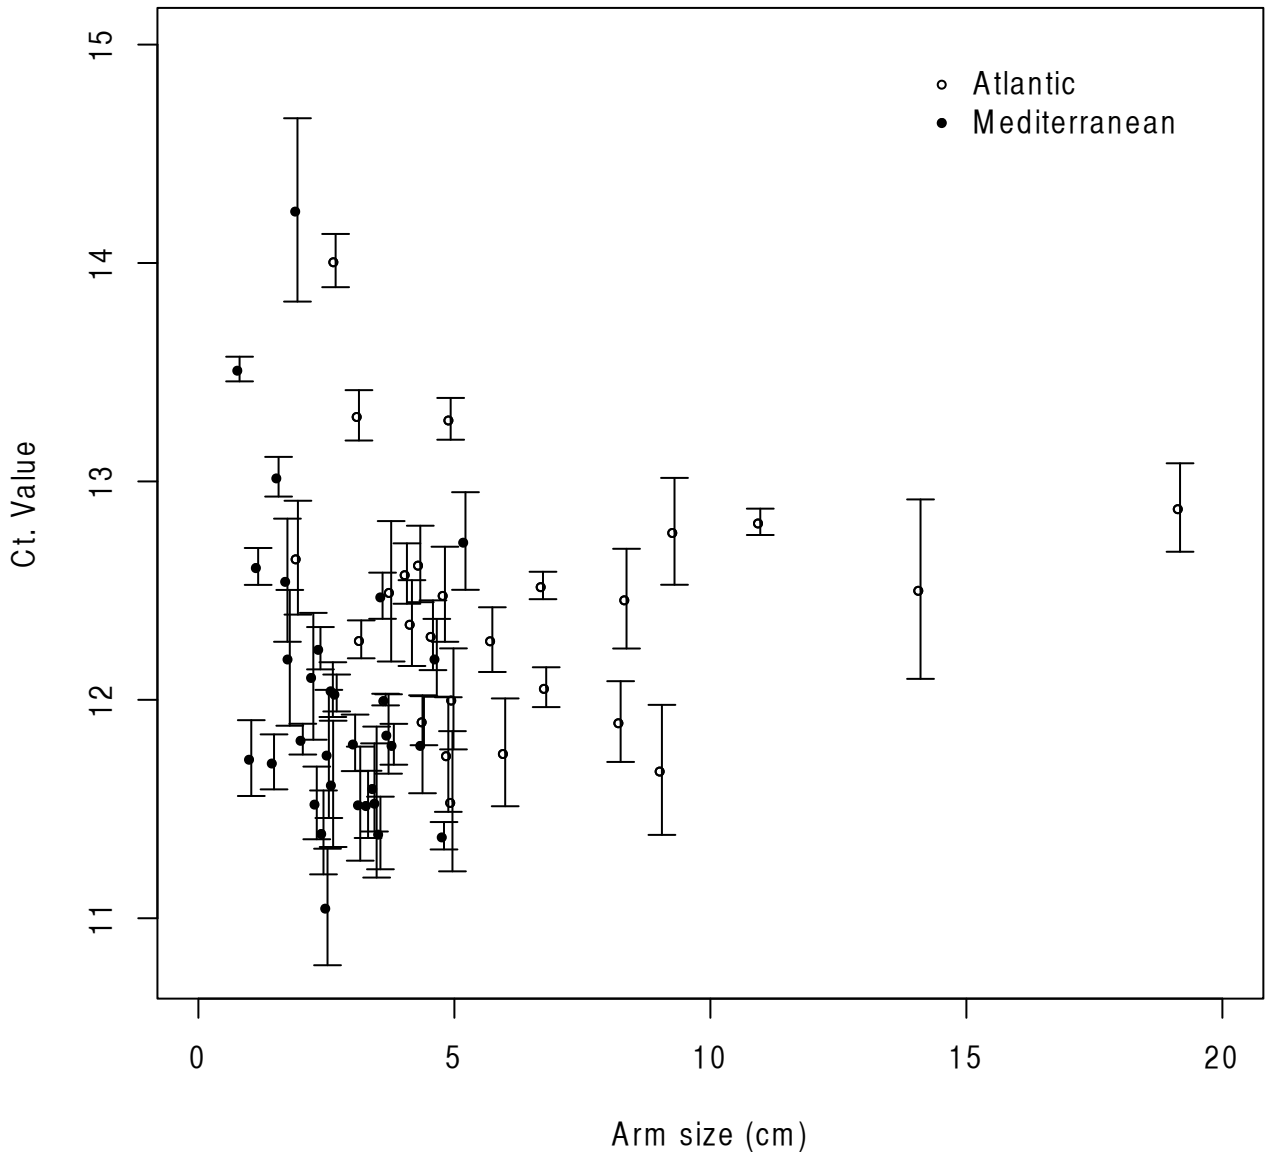

**SF 3.** Dot plot representing the mean Ct. value, at the y-axis, and the longest arm length, at the x-axis. Full filled dots represent Mediterranean individuals while white dots individuals from the Atlantic. Vertical bars represent the standard deviation from the three replicas analysis per each individual.
